# Supplementary material
Source: MDPI journal article supplement (https://www.mdpi.com/2073-4344/12/12/1595)
Supplement: s1 [file s1]

## Supplementary Materials

# A Hands-on Guide to the Synthesis of High-Purity and High-Surface-Area Magnesium Oxide

Marek Gliński <sup>1,\*</sup>, Agnieszka Czajka <sup>1</sup>, Urszula Ulkowska <sup>1</sup>, Ewa M. Iwanek (nee Wilczkowska) <sup>1</sup>,  
Dariusz Łomot <sup>2</sup> and Zbigniew Kaszukur <sup>2</sup>

<sup>1</sup> Faculty of Chemistry, Warsaw University of Technology, 00-664 Warsaw, Poland

<sup>2</sup> Institute of Physical Chemistry, Polish Academy of Sciences, 01-224 Warsaw, Poland

\* Correspondence: marek.glinski@pw.edu.pl (M.G.); Tel.: +48-22-234-7594

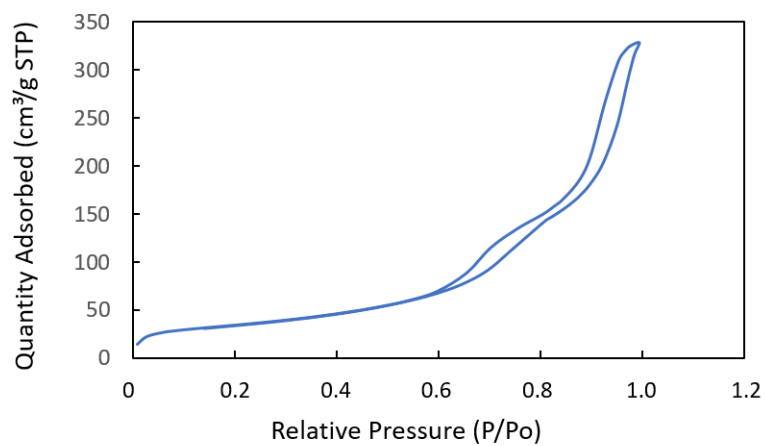

**Figure S1.** Example of hysteresis loop of purified magnesia.
